# Supplementary material for: UniFHy v0.1.1: a community modelling framework for the terrestrial water cycle in Python
Source: Copernicus journal article supplement (doi:10.5194/gmd-15-9177-2022), 2022-12-23
Supplement: Supplementary file [file gmd-15-9177-2022-supplement-title-page.pdf › gmd-15-9177-2022-supplement-title-page.pdf]

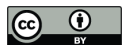

## *Supplement of*

# **UniFHy v0.1.1: a community modelling framework for the terrestrial water cycle in Python**

**Thibault Hallouin et al.**

*Correspondence to:* Thibault Hallouin ([th.thibault.hallouin@gmail.com](mailto:th.thibault.hallouin@gmail.com))

- [gmd-15-9177-2022-supplement-title-page.pdf](#)
- Supplement
  - [config1-Ouse.yml](#)
  - [config1-Severn.yml](#)
  - [config1-Tay.yml](#)
  - [config2-Ouse.yml](#)
  - [config2-Severn.yml](#)
  - [config2-Tay.yml](#)
  - [config3-Ouse.yml](#)
  - [config3-Severn.yml](#)
  - [config3-Tay.yml](#)

The copyright of individual parts of the supplement might differ from the article licence.
